# Supplementary material for: Sensitive and Reversible Ammonia Gas Sensor Based on Single-Walled Carbon Nanotubes
Source: Preprints.org preprint supplement (doi:10.20944/preprints202304.0211.v1), 2023-04-11

Sensitive and reversible ammonia gas sensor based on single-walled carbon nanotubes

Abniel Machín 1,*, María Cotto 2, José Duconge 2, Carmen Morant 3 , Florian I. Petrescu 2,4 and Francisco Márquez 2,*

| **Citation:** Lastname, F.; Lastname, F.; Last-name, F. Title. *Chemosensors* **2021**, *9*, x. https://doi.org/10.3390/xxxxx  Received: date  Accepted: date  Published: date  **Publisher’s Note:** MDPI stays neutral with regard to jurisdictional claims in published maps and institutional affiliations.  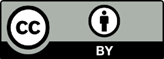  **Copyright:** © 2020 by the authors. Submitted for possible open access publication under the terms and conditions of the Creative Commons Attribution (CC BY) license (http://creativecommons.org/licenses/by/4.0/). |
| --- |

1 Division of Natural Sciences, Technology and Environment, Universidad Ana G. Méndez-Cupey Campus, 00926PR, United States; [machina1@uagm.edu](mailto:machina1@uagm.edu)

2 Nanomaterials Research Group, Department of Natural Sciences and Technology, Division of Natural Sciences, Technology and Environment, Universidad Ana G. Méndez-Gurabo Campus, 00778PR, United States; [mcotto48@uagm.edu](mailto:mcotto48@uagm.edu) (M.C.); [jduconge@uagm.edu](mailto:jduconge@uagm.edu) (J.D.)

3 Department of Applied Physics, Autonomous University of Madrid and Instituto de Ciencia de Materiales Nicolás Cabrera, 28049, Spain; [c.morant@uam.es](mailto:c.morant@uam.es)

4 IFToMM-ARoTMM, Bucharest Polytechnic University, Bucharest, (CE), Romania; [fitpetrescu@gmail.com](mailto:fitpetrescu@gmail.com)

* Correspondence: AM [machina1@uagm.edu](mailto:machina1@uagm.edu); FM [fmarquez@uagm.edu](mailto:fmarquez@uagm.edu)


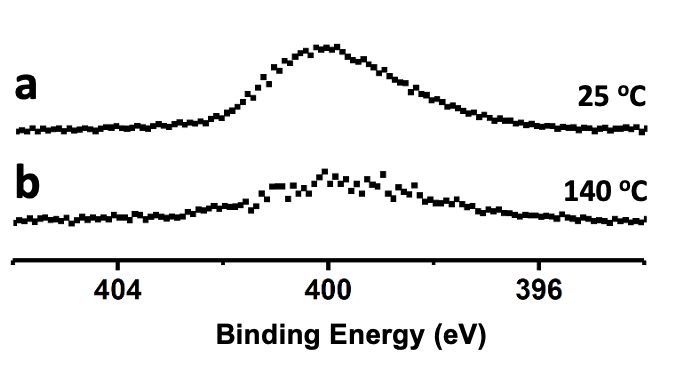


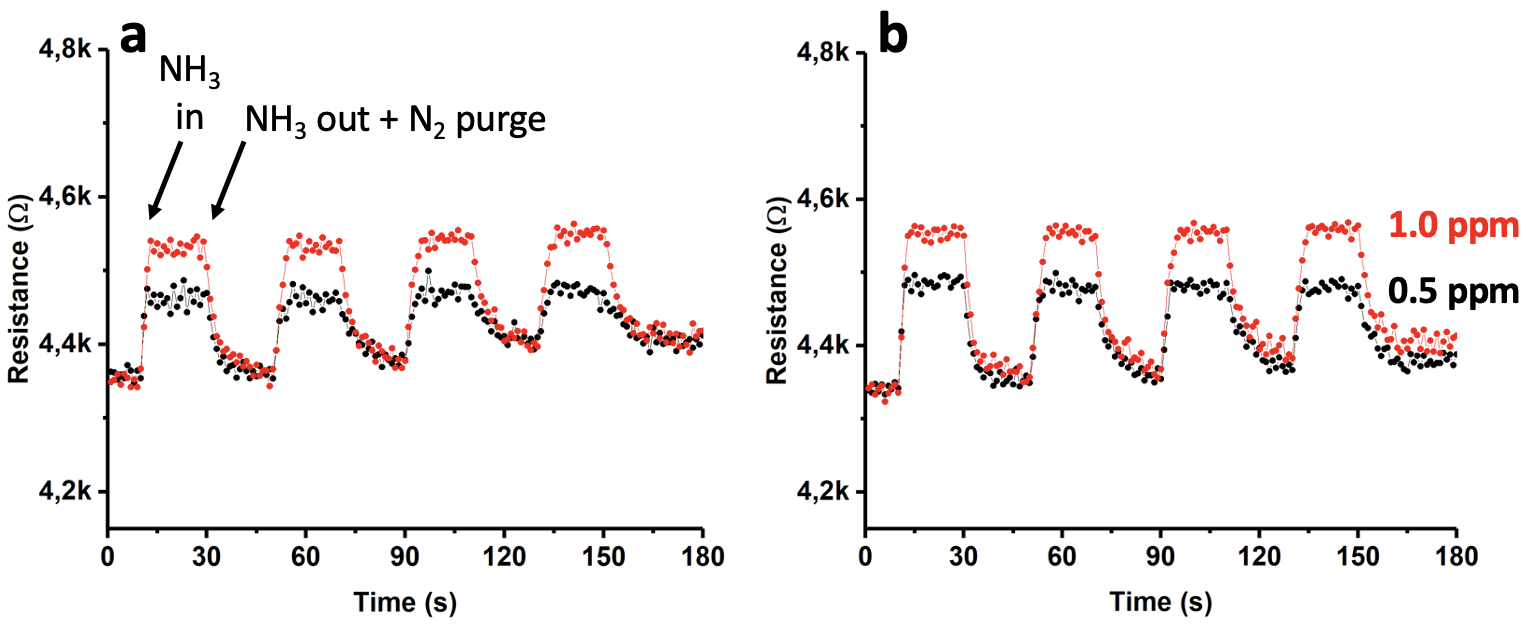


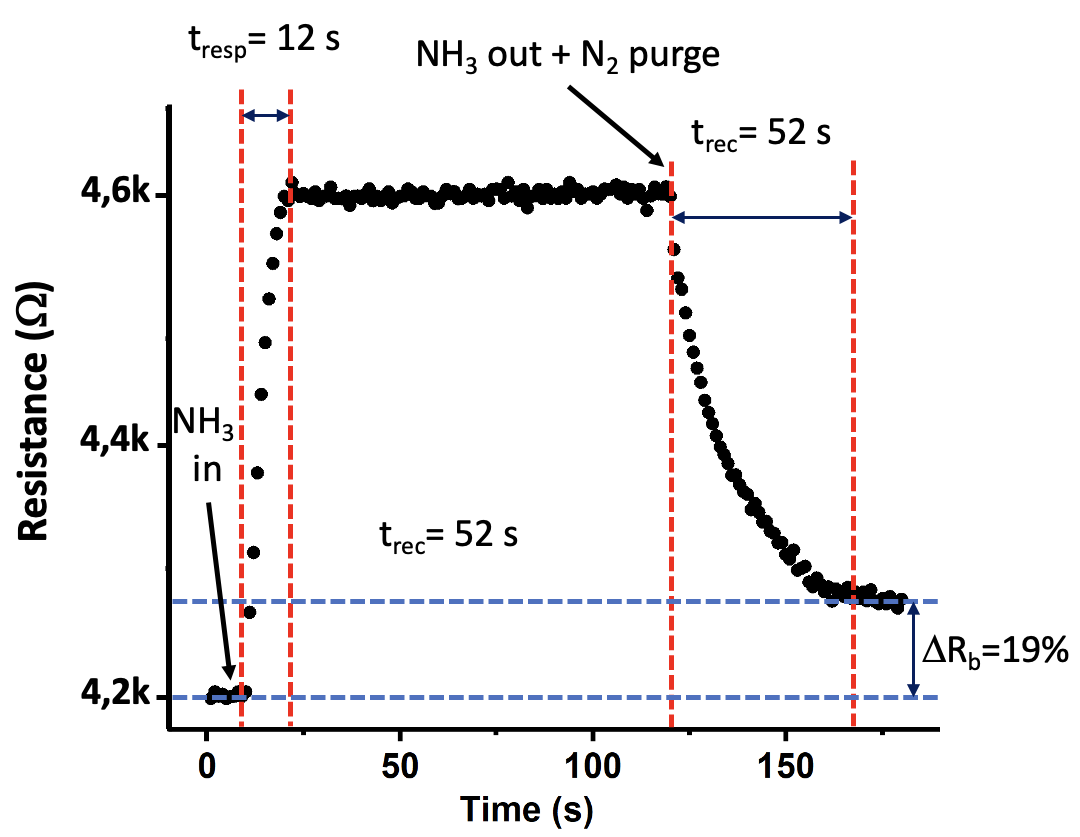

Supplement: Supplementary file 2 [file supplementary]
